# Supplementary material
Source: PubMed Central journal article supplement (PMC6739904)
Supplement: jamapsychiatry-77-68-s001.pdf [file jamapsychiatry-77-68-s001.pdf]

## Supplementary Online Content

Turban JL, Beckwith N, Reisner SL, Keuroghlian AS. Association between recalled exposure to gender identity conversion efforts and psychological distress and suicide attempts among transgender adults. *JAMA Psychiatry*. Published online September 11, 2019. doi:10.1001/jamapsychiatry.2019.2285

**eTable 1.** Demographics for Those With Exposure to Gender Identity Conversion Efforts by a Secular or Religious Professional

**eTable 2.** Outcomes for Those With Exposure to Gender Identity Conversion Efforts by a Secular or Religious Professional

**eTable 3.** Outcomes for Those With Lifetime Exposure to Gender Identity Conversion Efforts

**eTable 4.** Outcomes for Those With Childhood Exposure to Gender Identity Conversion Efforts

This supplementary material has been provided by the authors to give readers additional information about their work.

| <b>eTable 1. Demographics for Those With Exposure to Gender Identity Conversion Efforts by a Secular or Religious Professional.</b> Descriptive statistics for transgender adults who reported exposure to gender identity conversion efforts, with bivariate comparisons of those who reported conversion efforts by a secular-type professional versus those who reported conversion efforts by a religious advisor. |                                                       |                                                               |                                                     |         |
|------------------------------------------------------------------------------------------------------------------------------------------------------------------------------------------------------------------------------------------------------------------------------------------------------------------------------------------------------------------------------------------------------------------------|-------------------------------------------------------|---------------------------------------------------------------|-----------------------------------------------------|---------|
|                                                                                                                                                                                                                                                                                                                                                                                                                        |                                                       | Conversion efforts by a secular-type professional (n = 2,502) | Conversion efforts by religious advisor (n = 1,361) | P-value |
|                                                                                                                                                                                                                                                                                                                                                                                                                        |                                                       | N (%)                                                         | N (%)                                               |         |
| <b>Gender Identity</b>                                                                                                                                                                                                                                                                                                                                                                                                 |                                                       |                                                               |                                                     |         |
|                                                                                                                                                                                                                                                                                                                                                                                                                        | Cross-dresser                                         | 63 (2.5%)                                                     | 38 (2.8%)                                           | 0.6859  |
|                                                                                                                                                                                                                                                                                                                                                                                                                        | Trans woman (MTF) or woman (birth-assigned male)      | 1495 (59.8%)                                                  | 951 (69.9%)                                         | <.001   |
|                                                                                                                                                                                                                                                                                                                                                                                                                        | Trans man (FTM) or man (birth-assigned female)        | 568 (22.7%)                                                   | 248 (18.2%)                                         | 0.0013  |
|                                                                                                                                                                                                                                                                                                                                                                                                                        | Non-binary/genderqueer (birth-assigned female)        | 243 (9.7%)                                                    | 83 (6.1%)                                           | <.001   |
|                                                                                                                                                                                                                                                                                                                                                                                                                        | Non-binary/genderqueer (birth-assigned male)          | 133 (5.3%)                                                    | 41 (3.0%)                                           | 0.0013  |
| <b>Sexual Orientation</b>                                                                                                                                                                                                                                                                                                                                                                                              |                                                       |                                                               |                                                     |         |
|                                                                                                                                                                                                                                                                                                                                                                                                                        | Asexual                                               | 238 (9.5%)                                                    | 101 (7.4%)                                          | 0.0328  |
|                                                                                                                                                                                                                                                                                                                                                                                                                        | Bisexual                                              | 440 (17.6%)                                                   | 311 (22.9%)                                         | <.001   |
|                                                                                                                                                                                                                                                                                                                                                                                                                        | Gay/lesbian/same-gender-loving                        | 473 (18.9%)                                                   | 336 (24.7%)                                         | <.001   |
|                                                                                                                                                                                                                                                                                                                                                                                                                        | Heterosexual/straight                                 | 519 (20.7%)                                                   | 317 (23.3%)                                         | 0.0724  |
|                                                                                                                                                                                                                                                                                                                                                                                                                        | Pansexual                                             | 383 (15.3%)                                                   | 148 (10.9%)                                         | <.001   |
|                                                                                                                                                                                                                                                                                                                                                                                                                        | Queer                                                 | 273 (10.9%)                                                   | 79 (5.8%)                                           | <.001   |
|                                                                                                                                                                                                                                                                                                                                                                                                                        | Other                                                 | 176 (7.0%)                                                    | 69 (5.1%)                                           | 0.0201  |
| <b>Racial/Ethnic Identity</b>                                                                                                                                                                                                                                                                                                                                                                                          |                                                       |                                                               |                                                     |         |
|                                                                                                                                                                                                                                                                                                                                                                                                                        | Alaska Native/American Indian                         | 28 (1.1%)                                                     | 21 (1.5%)                                           | 0.3307  |
|                                                                                                                                                                                                                                                                                                                                                                                                                        | Asian/Asian American/Native Hawaiian/Pacific Islander | 43 (1.7%)                                                     | 18 (1.3%)                                           | 0.4181  |
|                                                                                                                                                                                                                                                                                                                                                                                                                        | Biracial/Multiracial/Other                            | 56 (2.2%)                                                     | 22 (1.6%)                                           | 0.2324  |
|                                                                                                                                                                                                                                                                                                                                                                                                                        | Black/African American                                | 228 (9.1%)                                                    | 250 (18.4%)                                         | <.001   |
|                                                                                                                                                                                                                                                                                                                                                                                                                        | Latino/a or Hispanic                                  | 306 (12.2%)                                                   | 302 (22.2%)                                         | <.001   |
|                                                                                                                                                                                                                                                                                                                                                                                                                        | White/Middle Eastern/North African                    | 1840 (73.5%)                                                  | 748 (55%)                                           | <.001   |
| <b>Age in Years</b>                                                                                                                                                                                                                                                                                                                                                                                                    |                                                       |                                                               |                                                     |         |
|                                                                                                                                                                                                                                                                                                                                                                                                                        | 18-24                                                 | 244 (9.8%)                                                    | 94 (6.9%)                                           | 0.0034  |
|                                                                                                                                                                                                                                                                                                                                                                                                                        | 25-44                                                 | 963 (38.5%)                                                   | 624 (45.8%)                                         | <.001   |
|                                                                                                                                                                                                                                                                                                                                                                                                                        | 45-64                                                 | 906 (36.2%)                                                   | 498 (36.6%)                                         | 0.8420  |
|                                                                                                                                                                                                                                                                                                                                                                                                                        | 65+                                                   | 389 (15.5%)                                                   | 145 (10.7%)                                         | <.001   |
| <b>Family Support of Gender</b>                                                                                                                                                                                                                                                                                                                                                                                        |                                                       |                                                               |                                                     |         |

|                        |                        |              |             |                 |
|------------------------|------------------------|--------------|-------------|-----------------|
| Identity               |                        |              |             |                 |
|                        | Supportive             | 983 (39.3%)  | 433 (31.8%) | <b>&lt;.001</b> |
|                        | Neutral                | 373 (14.9%)  | 315 (23.2%) | <b>&lt;.001</b> |
|                        | Unsupportive           | 648 (25.9%)  | 418 (30.7%) | <b>&lt;.001</b> |
|                        | Not asked              | 498 (19.9%)  | 195 (14.4%) | <b>&lt;.001</b> |
| Employment Status      |                        |              |             |                 |
|                        | Employed               | 1247 (49.8%) | 705 (51.8%) | 0.2584          |
|                        | Unemployed             | 251 (10.0%)  | 280 (20.6%) | <b>&lt;.001</b> |
|                        | Out of the labor force | 972 (38.8%)  | 374 (27.5%) | <b>&lt;.001</b> |
|                        | Unspecified            | 32 (1.3%)    | 2 (0.1%)    | <b>&lt;.001</b> |
| Total Household Income |                        |              |             |                 |
|                        | No income              | 70 (2.8%)    | 16 (1.2%)   | 0.0016          |
|                        | \$1 to \$9,999         | 304 (12.2%)  | 198 (14.5%) | 0.0387          |
|                        | \$10,000 to \$24,999   | 677 (27.1%)  | 398 (29.2%) | 0.1586          |
|                        | \$25,000 to \$49,999   | 496 (19.8%)  | 365 (26.8%) | <b>&lt;.001</b> |
|                        | \$50,000 to \$99,999   | 532 (21.3%)  | 192 (14.1%) | <b>&lt;.001</b> |
|                        | \$100,000 or more      | 289 (11.6%)  | 142 (10.4%) | 0.3173          |
|                        | Unspecified            | 134 (5.4%)   | 50 (3.7%)   | 0.0235          |

- 2 Note: Individuals who did not specify whether the professional was acting in the capacity of a religious  
3 advisor (n = 6) were excluded from this analysis. Rao-Scott chi-squared tests were used for categorical  
4 variables. Mann Whitney U test was used for 'Age in Years' comparison due to non-normality.  
5 Percentages given are for column totals within groups. Significant P values are bolded. P values < 0.001  
6 are significant based on correction for multiple comparisons.

7

**eTable 2. Outcomes for Those With Exposure to Gender Identity Conversion Efforts by a Secular or Religious Professional.** Mental health of transgender adults who reported conversion efforts by a religious advisor compared with those who reported conversion efforts by secular-type professionals, adjusted for gender identity, sexual orientation, race, age cohort, family support of gender identity, employment status, total household income, and exposure to sexual orientation conversion efforts.

|                                                               | aOR (95% CI)     | <i>P</i> -value     |
|---------------------------------------------------------------|------------------|---------------------|
| <b>Suicidality (Past 12 months)</b>                           |                  |                     |
| Past-year suicidal ideation                                   | 0.80 (0.4–1.47)  | 0.2338              |
| Past-year suicidal ideation with plan                         | 0.91 (0.48–1.74) | 0.6236              |
| Past-year suicide attempt                                     | 0.59 (0.25–1.41) | 0.0472              |
| Past-year suicide attempt requiring inpatient hospitalization | 0.62 (0.21–1.87) | 0.1542              |
| <b>Suicidality (Lifetime)</b>                                 |                  |                     |
| Lifetime suicidal ideation                                    | 0.87 (0.38–1.99) | 0.5661              |
| Lifetime suicide attempts                                     | 1.20 (0.62–2.33) | 0.3564 <sup>a</sup> |
| <b>Mental Health &amp; Substance Use</b>                      |                  |                     |
| Past-month severe psychological distress (K6 ≥ 13)            | 1.44 (0.79–2.63) | 0.0484              |
| Past-month binge drinking                                     | 1.30 (0.65–2.60) | 0.2097              |
| Lifetime cigarette use                                        | 1.22 (0.63–2.35) | 0.3284              |
| Lifetime illicit drug use                                     | 1.16 (0.61–2.21) | 0.4393              |

8

9 Note: Bolded *P* values indicate significance at  $P < 0.001$  (given adjustment for multiple comparisons).10 <sup>a</sup> Ordinal logistic regression with outcome categories 0, 1, and 2 or more.

**eTable 3. Outcomes for Those with Lifetime Exposure to Gender Identity Conversion Efforts.** Mental health outcomes of transgender adults exposed to gender identity conversion efforts compared with those who discussed gender identity with a professional without conversion efforts, adjusting for sex assigned at birth, gender identity, sexual orientation, race, age cohort, family support of gender identity, partnership status, educational attainment, employment status, total household income, and exposure to sexual orientation conversion efforts.

|                                                               | aOR (95% CI)     | P-value                     |
|---------------------------------------------------------------|------------------|-----------------------------|
| <b>Suicidality (Past 12 months)</b>                           |                  |                             |
| Past-year suicidal ideation                                   | 1.23 (0.89–1.70) | 0.0389                      |
| Past-year suicidal ideation with plan                         | 1.27 (0.90–1.79) | 0.0248                      |
| Past-year suicide attempt                                     | 1.26 (0.73–2.18) | 0.1606                      |
| Past-year suicide attempt requiring inpatient hospitalization | 1.44 (0.60–3.42) | 0.1698                      |
| <b>Suicidality (Lifetime)</b>                                 |                  |                             |
| Lifetime suicidal ideation                                    | 1.58 (0.93–2.68) | 0.0044                      |
| Lifetime suicide attempts                                     | 1.96 (1.38–2.80) | <b>&lt;.001<sup>a</sup></b> |
| <b>Mental Health &amp; Substance Use</b>                      |                  |                             |
| Past-month severe psychological distress (K6 $\geq 13$ )      | 1.34 (0.95–1.90) | 0.0054                      |
| Past-month binge drinking                                     | 0.79 (0.52–1.21) | 0.0694                      |
| Lifetime cigarette use                                        | 1.15 (0.81–1.64) | 0.1804                      |
| Lifetime illicit drug use                                     | 0.95 (0.67–1.35) | 0.6325                      |

Note: Bolded P values indicate significance at  $P < 0.001$  (given adjustment for multiple comparisons).

<sup>a</sup> Ordinal logistic regression with outcome categories 0, 1, and 2 or more.

**eTable 4. Outcomes for Those With Childhood Exposure to Gender Identity Conversion Efforts.** Mental health outcomes of transgender adults reporting exposure to gender identity conversion efforts before age 10 compared with those who reported discussing gender identity with a professional without conversion efforts in their lifetime, adjusted for age cohort, sex assigned at birth, race, family support of gender identity, employment status, total household income, and exposure to sexual orientation conversion efforts.

|                                                               | aOR (95% CI)     | P-value                     |
|---------------------------------------------------------------|------------------|-----------------------------|
| <b>Suicidality (Past 12 months)</b>                           |                  |                             |
| Past-year suicidal ideation                                   | 1.55 (0.74–3.25) | 0.0497                      |
| Past-year suicidal ideation with plan                         | 1.94 (0.93–4.03) | 0.0029                      |
| Past-year suicide attempt                                     | 1.64 (0.60–4.50) | 0.1065                      |
| Past-year suicide attempt requiring inpatient hospitalization | 1.43 (0.22–9.00) | 0.5272                      |
| <b>Suicidality (Lifetime)</b>                                 |                  |                             |
| Lifetime suicidal ideation                                    | 1.25 (0.41–3.76) | 0.5148                      |
| Lifetime suicide attempts                                     | 3.05 (1.55–6.02) | <b>&lt;.001<sup>a</sup></b> |
| <b>Mental Health &amp; Substance Use</b>                      |                  |                             |
| Past-month severe psychological distress (K6 ≥ 13)            | 1.47 (0.60–3.62) | 0.1606                      |
| Past-month binge drinking                                     | 0.76 (0.27–2.15) | 0.3827                      |
| Lifetime cigarette use                                        | 1.40 (0.58–3.36) | 0.2069                      |
| Lifetime illicit drug use                                     | 1.60 (0.74–3.48) | 0.0461                      |

Note: Bolded P values indicate significance at  $P < 0.001$  (given adjustment for multiple comparisons).  
<sup>a</sup> Ordinal logistic regression with outcome categories 0, 1, and 2 or more.
